# Supplementary material
Source: publisher figshare collection journal article supplement (https://asha.figshare.com/articles/dataset/_/21817959)
Supplement: Supplementary file 1 [file 1]

**Supplemental Material S2.** Benefits of principles of motor learning in motor speech interventions for children with CAS and upper limb motor interventions for children with CP.

| <b>PML</b>                                          | <b>Motor speech interventions for children with CAS</b>                                                           |                                                                                   | <b>Upper limb interventions for children with CP</b>                                   |                                                                                                     |
|-----------------------------------------------------|-------------------------------------------------------------------------------------------------------------------|-----------------------------------------------------------------------------------|----------------------------------------------------------------------------------------|-----------------------------------------------------------------------------------------------------|
| <b>Intervention dose</b>                            | <b>High-frequency</b>                                                                                             | <b>Moderate-frequency</b>                                                         | <b>High-frequency</b>                                                                  | <b>Low intensity</b>                                                                                |
|                                                     | Includes 100–150 trials per session<br>(Edeal & Gildersleeve-Neumann, 2011)                                       | Includes 30–40 trials per session<br>(Edeal & Gildersleeve-Neumann, 2011)         | Intervention dosage 30–40 hours                                                        | Intervention dosage: less than 14 hours                                                             |
|                                                     | Includes 12 sessions x 1 hr, 4 days a week for 3 weeks<br>(Maas et al., 2014)                                     | <b>Low intensity</b><br>Includes 20 sessions, 1 hr a week<br>(Maas et al., 2014)  | More effective<br>(Jackman et al., 2020)                                               | Less effective<br>(Jackman et al., 2020)                                                            |
| <b>Practice distribution: Massed vs Distributed</b> | <b>Massed Practice,</b>                                                                                           | <b>Distributed Practice</b>                                                       | <b>Massed Practice</b>                                                                 | <b>Distributed Practice</b>                                                                         |
|                                                     | More effective in DTTC <sup>2</sup> ; 2 sessions a day, 5 sessions a week for 8 weeks<br>(Maas & Farinella, 2012) | Less effective in DTTC: 3 sessions a week for 8 weeks<br>(Maas & Farinella, 2012) | More effective<br>Consists of:<br>3 hours a day for 2 weeks<br>(Klingels et al., 2013) | Less effective<br>Consists of:<br>5 x1 hour sessions a week for 10 weeks<br>(Klingels et al., 2013) |
|                                                     | Facilitates:<br>Accuracy of sounds<br>(Wambaugh et al., 2013)                                                     |                                                                                   |                                                                                        |                                                                                                     |
|                                                     | Acquisition of skills<br>(Knock et al. 2000; Maas et al., 2019)                                                   |                                                                                   |                                                                                        |                                                                                                     |
|                                                     | Retention of skills<br>(Knock et al. 2000)                                                                        |                                                                                   |                                                                                        |                                                                                                     |

|                                                                     |                                                                                                                                                                                                   |                                                                                                                                                                                           |                                                                         |                                                                         |
|---------------------------------------------------------------------|---------------------------------------------------------------------------------------------------------------------------------------------------------------------------------------------------|-------------------------------------------------------------------------------------------------------------------------------------------------------------------------------------------|-------------------------------------------------------------------------|-------------------------------------------------------------------------|
| <b>Practice variability:<br/>Varied vs<br/>Constant<br/>targets</b> | <b>Variable practice</b><br><br>Facilitates:<br>Production of sounds<br>(Ballard et al., 2007)                                                                                                    | <b>Constant practice</b><br><br>Facilitates:<br>Acquisition of skills<br>(Park & Shea, 2005)                                                                                              | <b>Variable practice</b><br><br>More effective<br>(Demers et al., 2021) | <b>Constant practice</b><br><br>Less effective<br>(Demers et al., 2021) |
| <b>Practice schedule:<br/>Random vs<br/>Blocked</b>                 | <b>Random practice</b><br><br>Facilitates:<br>Retention and transfer of skills<br>(Knock et al., 2000; Scheiner et al., 2014)<br><br>Faster acquisition of new skills<br>(Maas & Farinella, 2012) | <b>Blocked practice</b><br><br>Facilitates:<br>Acquisition of new speech skills.<br>(Knock et al., 2000; Scheiner et al., 2014)<br><br>Improvements in speech<br>(Maas & Farinella, 2012) | <b>Random practice</b><br><br>More effective<br>(Prado et al., 2017)    | <b>Constant practice</b><br><br>Less effective<br>(Prado et al., 2017)  |
| <b>Attentional focus:<br/>Internal vs<br/>External</b>              | <b>External focus</b><br><br>Facilitates:<br>Automatic control of speech movements, consistent speech productions<br>(Freedman et al., 2007; Lisman & Sadagopan, 2013)                            | <b>Internal focus</b><br><br>No data                                                                                                                                                      | <b>External focus</b><br><br>More effective<br>(Pourazar et al., 2017)  | <b>Internal focus</b><br><br>Less effective<br>(Pourazar et al., 2017)  |
| <b>Target complexity:<br/>Complex vs<br/>Simple</b>                 | <b>Complex target</b><br><br>Facilitates:<br>Moderate contribution to improvement<br>(Maas et al., 2019)                                                                                          | <b>Simple target</b><br><br>No data                                                                                                                                                       | <b>Complex target</b><br><br>No data                                    | <b>Simple Target</b><br><br>No data                                     |

|                                                                                        |                                                                                                                                                         |                                                                                                                                                                                                  |                                                                                                                                                                    |                                                                                                                                                            |
|----------------------------------------------------------------------------------------|---------------------------------------------------------------------------------------------------------------------------------------------------------|--------------------------------------------------------------------------------------------------------------------------------------------------------------------------------------------------|--------------------------------------------------------------------------------------------------------------------------------------------------------------------|------------------------------------------------------------------------------------------------------------------------------------------------------------|
| <b>Feedback type:<br/>Knowledge of<br/>performance<br/>vs Knowledge<br/>of results</b> | <b>Knowledge of<br/>performance</b><br><br>Facilitates:<br>Self-evaluation skills and<br>retention<br>(Knock et al., 2000)                              | <b>Knowledge of results</b><br><br>No data                                                                                                                                                       | <b>Knowledge of<br/>performance</b><br><br>More effective once skill<br>is learnt<br>(Muratori et al., 2013)<br><br>Inconclusive findings<br>(Robert et al., 2017) | <b>Knowledge of results</b><br><br>More effective in skill<br>acquisition<br>(Muratori et al., 2013)<br><br>Inconclusive findings<br>(Robert et al., 2017) |
| <b>Feedback<br/>frequency:<br/>Frequent vs<br/>Infrequent</b>                          | <b>High frequency</b><br><br>Feedback given:<br>100% of all trials<br><br>Less effective<br>(Katz et al., 2010; Maas et al.,<br>2012; Kim et al., 2012) | <b>Low frequency</b><br><br>Feedback given:<br>20%, 50% or 60% of all<br>trials<br><br>More effective<br>(Katz et al., 2010; Kim et al.,<br>2012)<br>Inconsistent findings<br>(Maas et al. 2012) | <b>High frequency</b><br><br>Feedback given:<br>100% of all trials<br><br>More errors<br><br>No difference in skill<br>acquisition<br>(Burtner et al., 2014)       | <b>Low frequency</b><br><br>62% feedback more<br>errors<br><br>Less errors<br><br>No difference in skill<br>acquisition<br>(Burtner et al., 2014)          |
| <b>Feedback<br/>timing:<br/>Delayed vs<br/>Immediate</b>                               | <b>Delayed feedback</b><br><br>Facilitates:<br>acquisition, retention, and<br>transfer of skills<br>(Hula et al., 2008).                                | <b>Immediate feedback</b><br><br>Facilitates:<br>Faster rate of acquisition<br>(Hula et al., 2008; Bislick et al.,<br>2012).                                                                     | <b>Delayed feedback</b><br><br>More effective<br>(Muratori et al., 2013)                                                                                           | <b>Immediate feedback</b><br><br>Less effective<br>(Muratori et al., 2013)                                                                                 |

<sup>1</sup>Principles of motor learning (PML); <sup>2</sup>Dynamic Temporal Tactile Cuing (DTTC; Strand et al., 2020)

## References

- Bislick, L., Weir, P., Spencer, K., Kendall, D., & Yorkston, K. (2012). Do principles of motor learning enhance retention and transfer of speech skills? A systematic review. *Aphasiology*, 26(5), 709–28. <https://doi.org/10.1080/02687038.2012.676888>
- Burtner, P. A., Leinwand, R., Sullivan, K. J., Goh, H. T., & Kantak, S. S. (2014). Motor learning in children with hemiplegic cerebral palsy: Feedback effects on skill acquisition. *Developmental Medicine & Child Neurology*, 56(3), 259-266. <https://doi.org/10.1111/dmcn.12364>
- Edeal, D. & Gildersleeve-Neumann, C. (2011). The importance of production frequency in therapy for childhood apraxia of speech. *American Journal of Speech-Language Pathology*, 20(2), 95-110. [https://doi.org/10.1044/1058-0360\(2011/09-0005\)](https://doi.org/10.1044/1058-0360(2011/09-0005))
- Hula, S. N. A., Robin, D. A., Maas, E., Ballard, K. J., & Schmidt, R. A. (2008). Effects of feedback frequency and timing on acquisition, retention, and transfer of speech skills in acquired apraxia of speech. *Journal of Speech, Language, and Hearing Research*, 51(5), 1088-1113. [https://doi.org/10.1044/1092-4388\(2008/06-0042\)](https://doi.org/10.1044/1092-4388(2008/06-0042))
- Jackman, M., Lannin, N., Galea, C., Sakzewski, L., Miller, L., & Novak, I. (2020) What is the threshold dose of upper limb training for children with cerebral palsy to improve function? A systematic review. *Australian Occupational Therapy Journal*, 67(3), 269-280. <https://doi.org/10.1111/1440-1630.12666>
- Katz, C. R. (2012). Integrated approach to outpatient dental treatment of a patient with cerebral palsy: A case report. *Special Care in Dentistry*, 32(5), 210-217. <https://doi.org/10.1111/j.1754-4505.2012.00267.x>
- Kim, I. S., LaPointe, L. L., & Stierwalt, J. A. (2012). The effect of feedback and practice on the acquisition of novel speech behaviors. *American Journal of Speech-Language Pathology*, 21(2), 89–100. [https://doi.org/10.1044/1058-0360\(2011/09-0082\)](https://doi.org/10.1044/1058-0360(2011/09-0082))
- Klingels, K., Feys, H., Molenaers, G., Verbeke, G., Van Daele, S., Hoskens, J., Desloovere, K., & De Cock, P. (2013). Randomized trial of modified constraint-induced movement therapy with and without an intensive therapy program in children with unilateral cerebral palsy. *Neurorehabilitation and Neural Repair*, 27(9), 799-807. <https://doi.org/10.1177/1545968313496322>
- Knock, T. R., Ballard, K. J., Robin, D. A., & Schmidt, R. A. (2000). Influence of order of stimulus presentation on speech motor learning: A principled approach to treatment for apraxia of speech. *Aphasiology*, 14(5-6), 653-668. <https://doi.org/10.1080/026870300401379>
- Maas, E., & Farinella, K. A. (2012). Random versus blocked practice in treatment for childhood apraxia of speech. *Journal of Speech, Language, and Hearing* 5(2), 561-578. [https://doi.org/10.1044/1092-4388\(2011/11-0120\)](https://doi.org/10.1044/1092-4388(2011/11-0120))
- Maas, E., Gildersleeve-Neumann, C. E., Jakielski, K. J., & Stoeckel, R. (2014). Motor-based intervention protocols in treatment of childhood apraxia of speech (CAS). *Current Developmental Disorders Reports*, 1(3), 197-206. <https://doi.org/10.1007/s40474-014-0016-4>

- Maas, E., Gildersleeve-Neumann, C., Jakielski, K., Kovacs, N., Stoeckel, R., Vradelis, H. & Welsh, M. (2019) Bang for your buck: A single-case experimental design study of practice amount and distribution in treatment for childhood apraxia of speech. *Journal of Speech, Language, and Hearing Research*, 26(9), 3160-3182. [https://doi.org/10.1044/2019\\_JSLHR-S-18-0212](https://doi.org/10.1044/2019_JSLHR-S-18-0212)
- Muratori L., Lamberg E., Quinn L., & Duff S. (2013) Applying principles of motor learning and control to upper extremity rehabilitation. *Journal of Hand Therapy*, 26(2), 94-102. <https://doi.org/10.1016/j.jht.2012.12.007>
- Robert, M. T., Sambasivan, K., & Levin, M. F. (2017). Extrinsic feedback and upper limb motor skill learning in typically-developing children and children with cerebral palsy. *Restorative Neurology and Neuroscience*, 35(2), 171-184. <https://doi.org/10.3233/RNN-160688>
- Strand, E. A. (2020). Dynamic temporal and tactile cueing: A treatment strategy for childhood apraxia of speech. *American Journal of Speech-Language Pathology*, 29(1), 30-48. [https://doi.org/10.1044/2019\\_AJSLP-19-0005](https://doi.org/10.1044/2019_AJSLP-19-0005)
- Wambaugh, J. L., Nessler, C., Cameron, R., & Mauszycki, S. C. (2013). Treatment for acquired apraxia of speech: Examination of treatment intensity and practice schedule. *American Journal of Speech-Language Pathology*, 22(1), 84-102. [https://doi.org/10.1044/1058-0360\(2012/12-0025\)](https://doi.org/10.1044/1058-0360(2012/12-0025))
